# Supplementary material for: Do the unlabeled response categories of the Minnesota Living with Heart Failure Questionnaire satisfy the monotonicity assumption of simple-summated scoring?
Source: Springer Nature journal article supplement (doi:10.1007/s11136-020-02422-8), 2020-01-28
Supplement: MOESM2 [file 17602450]

**Appendix Table 2. Comparison of Point Estimates for Original Minnesota Living with Heart Failure Scoring Versus Three Empirically Supported Recoding Schemes**

|  | Original Scoring | Recode 1 | Recode 2 | Recode 3 |
| --- | --- | --- | --- | --- |
| Randomization group | -4.23* | -1.46* | -2.39* | -3.68* |
|  | (1.79) | (0.66) | (1.05) | (1.55) |
| MLHFQ Baseline | 0.22*** | 0.19*** | 0.22*** | 0.24*** |
|  | (0.04) | (0.04) | (0.04) | (0.04) |
| Social isolation | -3.48 | -1.34 | -2.18 | -3.29 |
|  | (2.25) | (0.83) | (1.32) | (1.96) |
| Age, years |  |  |  |  |
| 55 - 59 | 0.98 | 0.31 | 0.86 | 0.83 |
|  | (4.24) | (1.56) | (2.49) | (3.68) |
| 60 - 64 | -7.71 | -2.94* | -4.20 | -6.58 |
|  | (3.94) | (1.45) | (2.32) | (3.42) |
| 65 - 69 | -5.75 | -2.19 | -2.95 | -4.88 |
|  | (4.22) | (1.55) | (2.49) | (3.66) |
| 70 - 74 | -10.21* | -3.80* | -5.76* | -9.06* |
|  | (4.33) | (1.60) | (2.55) | (3.76) |
| 75 - 79 | -3.16 | -1.11 | -1.55 | -2.97 |
|  | (4.57) | (1.68) | (2.69) | (3.97) |
| 80 - 85 | -5.38 | -1.75 | -2.60 | -5.20 |
|  | (4.55) | (1.68) | (2.68) | (3.95) |
| 86 - 89 | -3.03 | -1.27 | -1.49 | -2.64 |
|  | (4.65) | (1.71) | (2.74) | (4.03) |
| > 90 | -6.52 | -2.31 | -3.86 | -6.49 |
|  | (5.57) | (2.05) | (3.28) | (4.84) |
| Female | -0.71 | -0.40 | -0.42 | -0.18 |
|  | (1.94) | (0.71) | (1.14) | (1.69) |
| Race |  |  |  |  |
| African American | 0.30 | 0.02 | 0.13 | 0.01 |
|  | (2.43) | (0.89) | (1.43) | (2.11) |
| Hispanic/Latino | 0.08 | 0.10 | 0.07 | 0.13 |
|  | (3.04) | (1.12) | (1.79) | (2.64) |
| Asian/Pacific Islander & Other | 0.09 | 0.35 | 0.24 | 0.19 |
|  | (3.03) | (1.12) | (1.78) | (2.64) |
| Insurance |  |  |  |  |
| Medicaid | 11.61** | 4.38** | 6.80** | 9.93** |
|  | (3.92) | (1.44) | (2.31) | (3.40) |

**Appendix Table 2 continued. Comparison of Point Estimates for Original Minnesota Living with Heart Failure Scoring Versus Three Empirically Supported Recoding Schemes**

|  | Original Scoring | Recode 1 | Recode 2 | Recode 3 |
| --- | --- | --- | --- | --- |
| Medicare | 3.80 | 1.53 | 2.12 | 3.43 |
|  | (3.21) | (1.18) | (1.89) | (2.79) |
| Medicare + Medicaid | 6.05 | 2.10 | 3.40 | 5.32 |
|  | (3.40) | (1.25) | (2.00) | (2.95) |
| Other Insurance | 6.28 | 2.35 | 3.79 | 5.92 |
|  | (4.52) | (1.66) | (2.66) | (3.92) |
| Income |  |  |  |  |
| $25-50k | 2.01 | 0.70 | 1.15 | 1.86 |
|  | (2.63) | (0.97) | (1.55) | (2.28) |
| $50-75k | -3.07 | -1.01 | -1.64 | -2.43 |
|  | (3.28) | (1.21) | (1.93) | (2.85) |
| > $75k | -1.17 | -0.16 | -0.54 | -0.91 |
|  | (3.16) | (1.16) | (1.86) | (2.74) |
| Don’t Know/Refuse | -5.28* | -1.69 | -2.78 | -4.63* |
|  | (2.67) | (0.98) | (1.57) | (2.32) |
| Valvular disease | -1.12 | -0.46 | -0.63 | -1.00 |
|  | (2.04) | (0.75) | (1.20) | (1.77) |
| Pulmonary circulation disease | 0.33 | 0.17 | 0.10 | 0.46 |
|  | (2.21) | (0.81) | (1.30) | (1.92) |
| Peripheral vascular disease | -3.48 | -1.23 | -2.02 | -2.66 |
|  | (2.96) | (1.09) | (1.74) | (2.57) |
| Other neurological disease | -1.45 | -0.45 | -0.88 | -1.01 |
|  | (4.54) | (1.67) | (2.67) | (3.95) |
| Chronic pulmonary disease | 1.27 | 0.63 | 0.76 | 1.28 |
|  | (1.93) | (0.71) | (1.13) | (1.67) |
| Diabetes without chronic complication | 0.83 | 0.42 | 0.44 | 0.60 |
| (2.03) | (0.75) | (1.19) | (1.76) |
| Diabetes with chronic complication | -0.54 | 0.04 | -0.35 | -0.90 |
|  | (3.14) | (1.16) | (1.85) | (2.73) |
| Hyperthyroidism | 0.32 | -0.05 | 0.20 | 0.42 |
|  | (2.34) | (0.86) | (1.38) | (2.04) |
| Renal failure | 2.34 | 0.78 | 1.32 | 2.07 |
|  | (2.10) | (0.77) | (1.23) | (1.82) |
| Liver disease | 6.72 | 2.52 | 3.85 | 5.61 |
|  | (4.06) | (1.49) | (2.39) | (3.53) |

**Appendix Table 2 continued. Comparison of Point Estimates for Original Minnesota Living with Heart Failure Scoring Versus Three Empirically Supported Recoding Schemes**

|  | Original Scoring | Recode 1 | Recode 2 | Recode 3 |
| --- | --- | --- | --- | --- |
| Rheumatoid arthritis | 4.27 | 1.83 | 2.75 | 3.33 |
|  | (4.65) | (1.71) | (2.73) | (4.04) |
| Obesity | 3.53 | 1.26 | 2.10 | 3.24 |
|  | (2.42) | (0.89) | (1.42) | (2.10) |
| Deficiency anemias | -0.96 | -0.45 | -0.69 | -0.68 |
|  | (2.10) | (0.77) | (1.23) | (1.82) |
| Depression | 6.76* | 2.33* | 3.97* | 5.97* |
|  | (3.00) | (1.11) | (1.77) | (2.61) |
| Hypertension | -1.62 | -0.78 | -0.98 | -0.95 |
|  | (2.45) | (0.90) | (1.44) | (2.13) |
| Year |  |  |  |  |
| 2012 | 0.74 | 0.11 | 0.66 | 0.71 |
|  | (4.59) | (1.69) | (2.70) | (3.98) |
| 2013 | -0.84 | -0.62 | -0.40 | -0.80 |
|  | (5.03) | (1.85) | (2.96) | (4.36) |
| Quarter |  |  |  |  |
| 2 | 0.60 | 0.29 | 0.30 | 0.21 |
|  | (2.30) | (0.85) | (1.35) | (2.00) |
| 3 | -1.98 | -0.54 | -0.98 | -2.10 |
|  | (2.60) | (0.96) | (1.53) | (2.26) |
| 4 | -0.19 | -0.20 | -0.03 | -0.36 |
|  | (3.20) | (1.18) | (1.88) | (2.78) |
| Constant | 22.69** | 8.97** | 12.85** | 19.53** |
|  | (7.57) | (2.82) | (4.47) | (6.57) |

The above models evaluate the effectiveness of a telemedicine intervention on HRQOL at 180-days post randomization. The primary outcome is MLHFQ summary score. Larger values signify more effect of heart failure on HRQOL. Study effects are robust when comparing the original scoring versus three empirically supported recoding schemes. Though not presented here, an analysis of 30-days post randomization study effects yielded similar results. The reference age category is < 55, insurance is private, year is 2011, and quarter is 1. Standard errors are in parentheses and * p<0.05, ** p<0.01, *** p<0.001.
